# Supplementary material
Source: MDPI journal article supplement (https://www.mdpi.com/2304-6740/11/5/220)
Supplement: s1 [file s1]

# Structural and Antimicrobial Investigation of Some New Nanoparticles Mixed Ligands Metal Complexes of Ethyl 6-Amino-4-(4-chlorophenyl)-5-cyano-2-methyl-4H-pyran-3-carboxylate in Presence of 1,10-Phenanthroline

Mohamed S. El-Attar <sup>1</sup>, Sadeek A. Sadeek <sup>1</sup>, Hassan A. El-Sayed <sup>1</sup>, Heba M. Kamal <sup>1</sup> and Hazem S. Elshafie <sup>2,\*</sup>

<sup>1</sup> Department of Chemistry, Faculty of Science, Zagazig University, Zagazig 44519, Egypt; mselattar@zu.edu.eg (M.S.E.); s\_sadeek@zu.edu.eg (S.A.S.); hasanneg@zu.edu.eg (H.A.E.); hm.abdelaaty019@science.zu.edu.eg (H.M.K.)

<sup>2</sup> School of Agricultural, Forestry, Food and Environmental Sciences, University of Basilicata, Viale dell'Ateneo Lucano 10, 85100 Potenza, Italy

\* Correspondence: hazem.elshafie@unibas.it; Tel.: +39-0971-205498; Fax: +39-0971-205503 (H.S.E.)

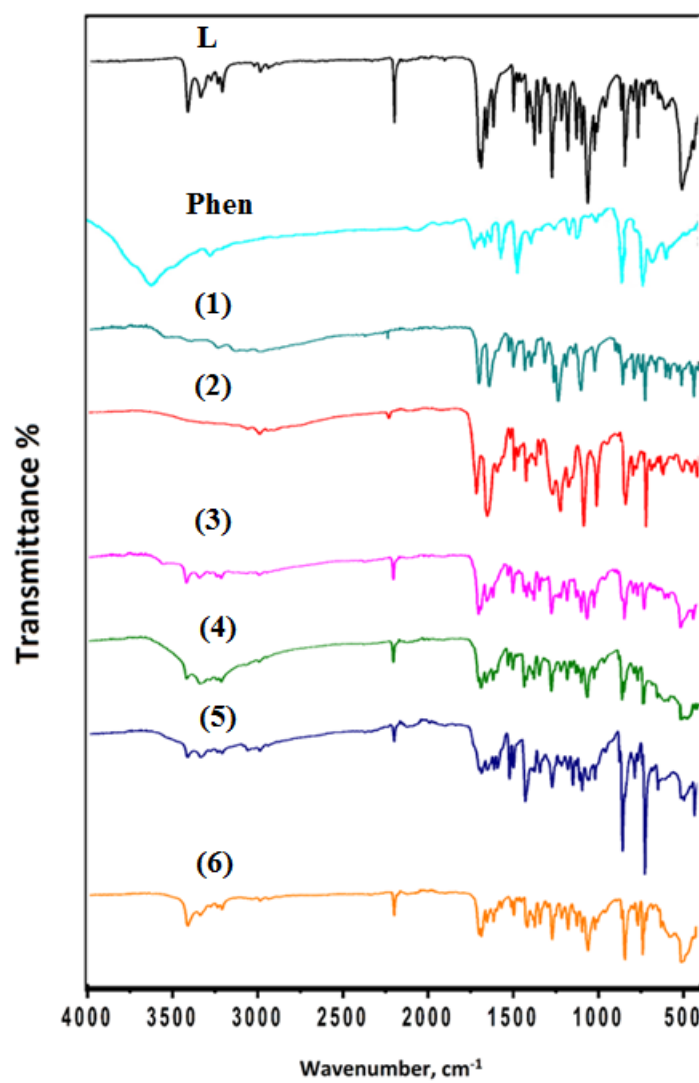

**Figure S1.** FT-IR spectra for **L**, **Phen** and their complexes.

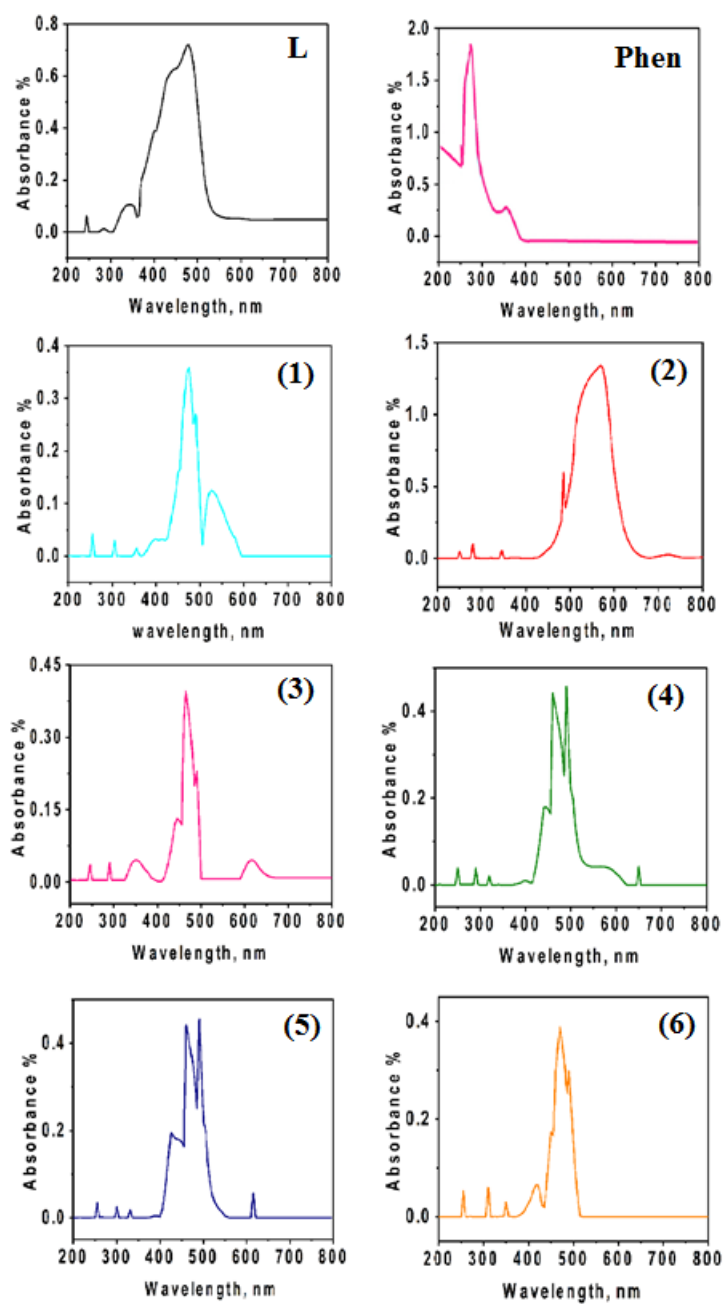

Figure S2. UV-vis. spectra for **L**, **Phen** and their complexes.

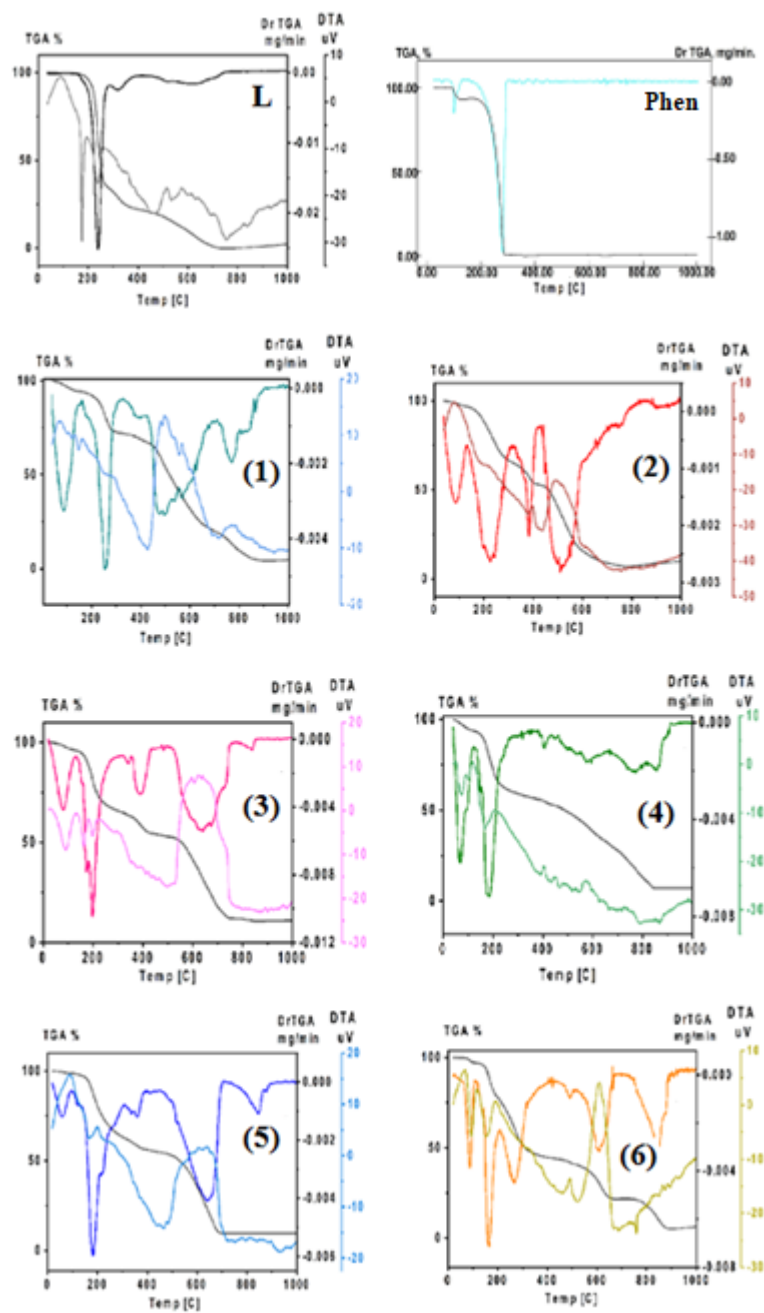

Figure S3. TG, DTG and DTA diagrams for **L**, **Phen** and their complexes.

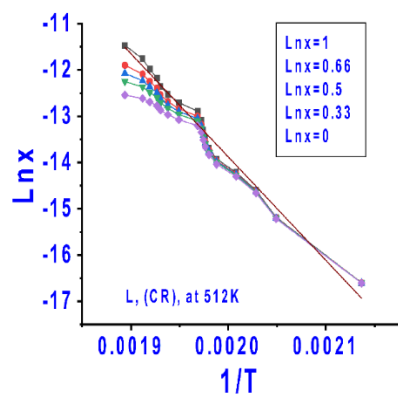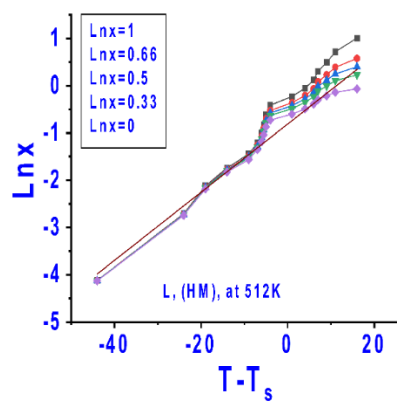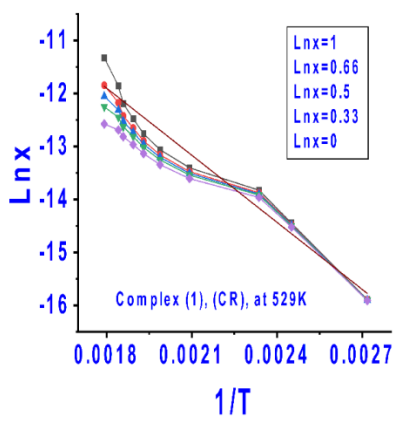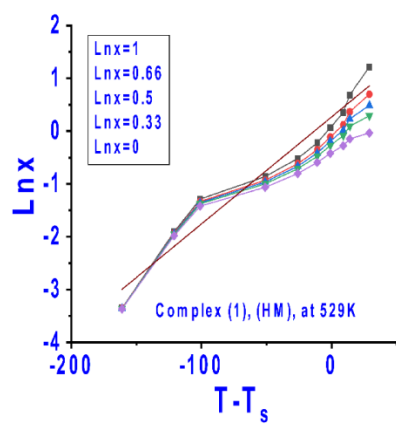

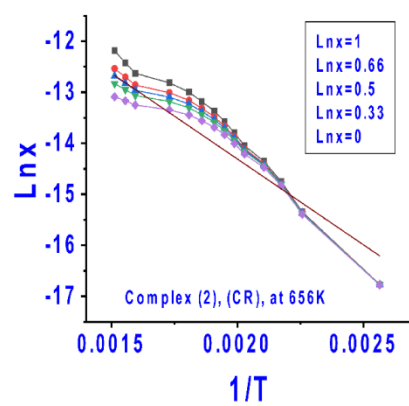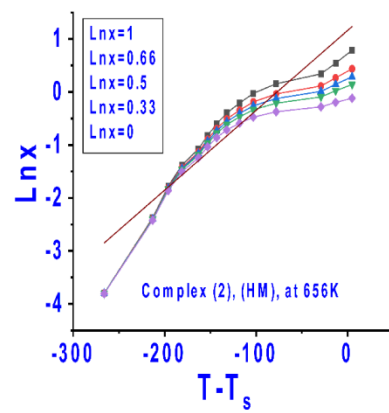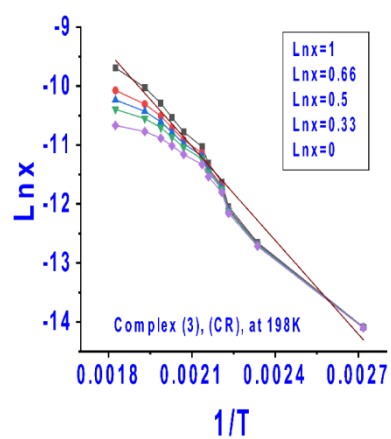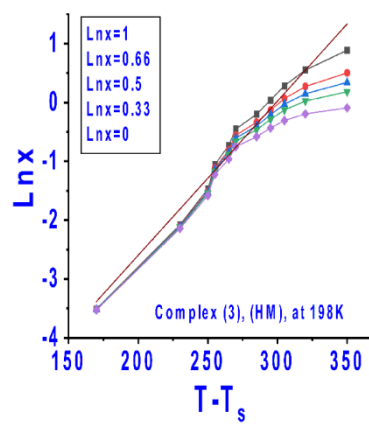

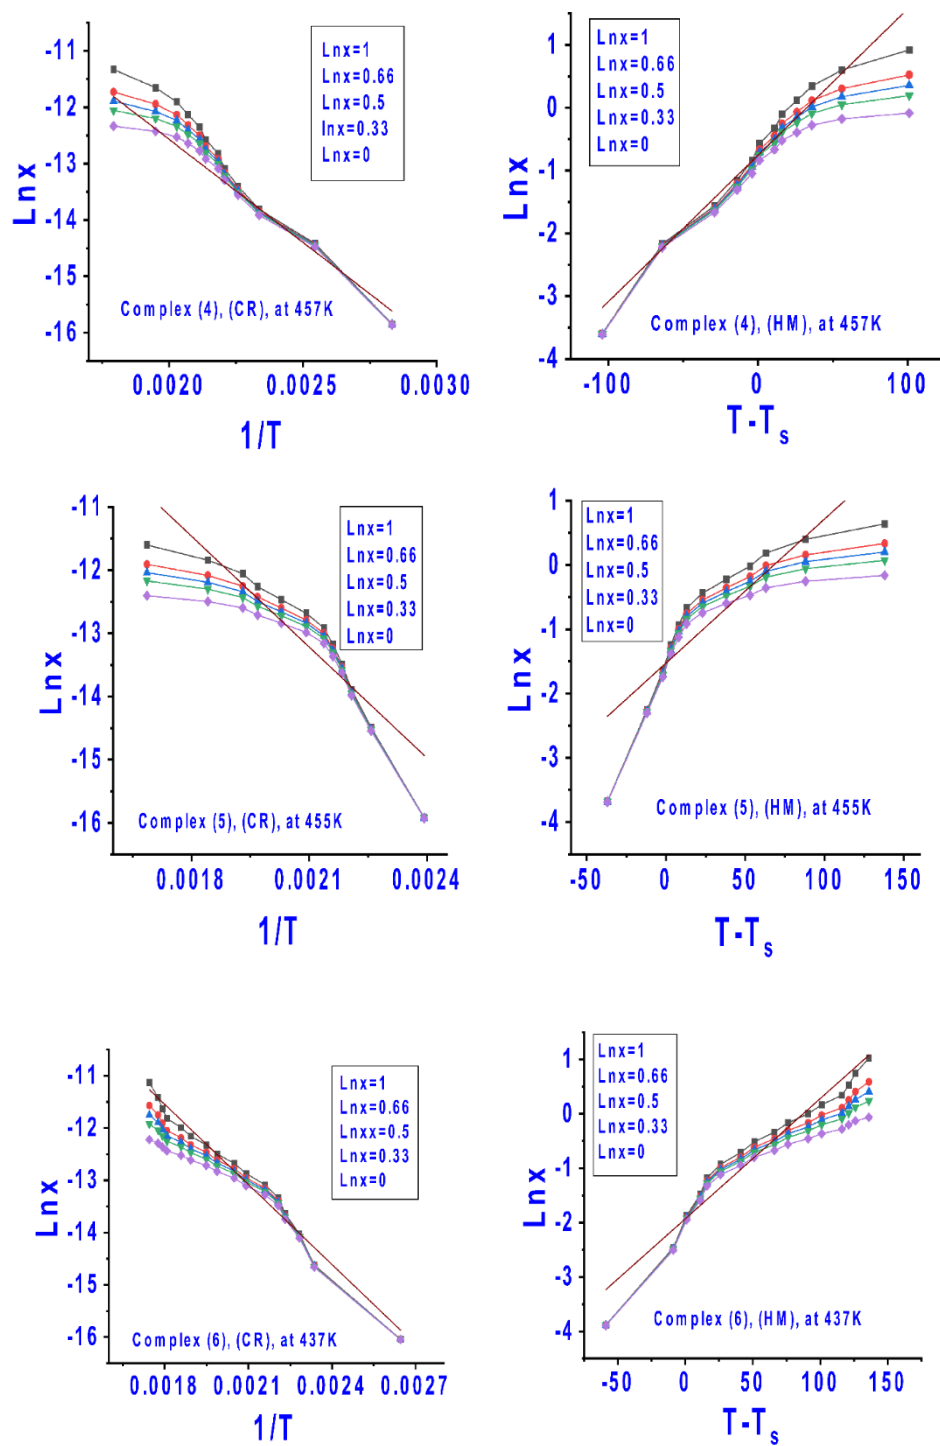

**Figure S4.** Kinetic parameters diagrams of **L, Phen** and their metal complexes.

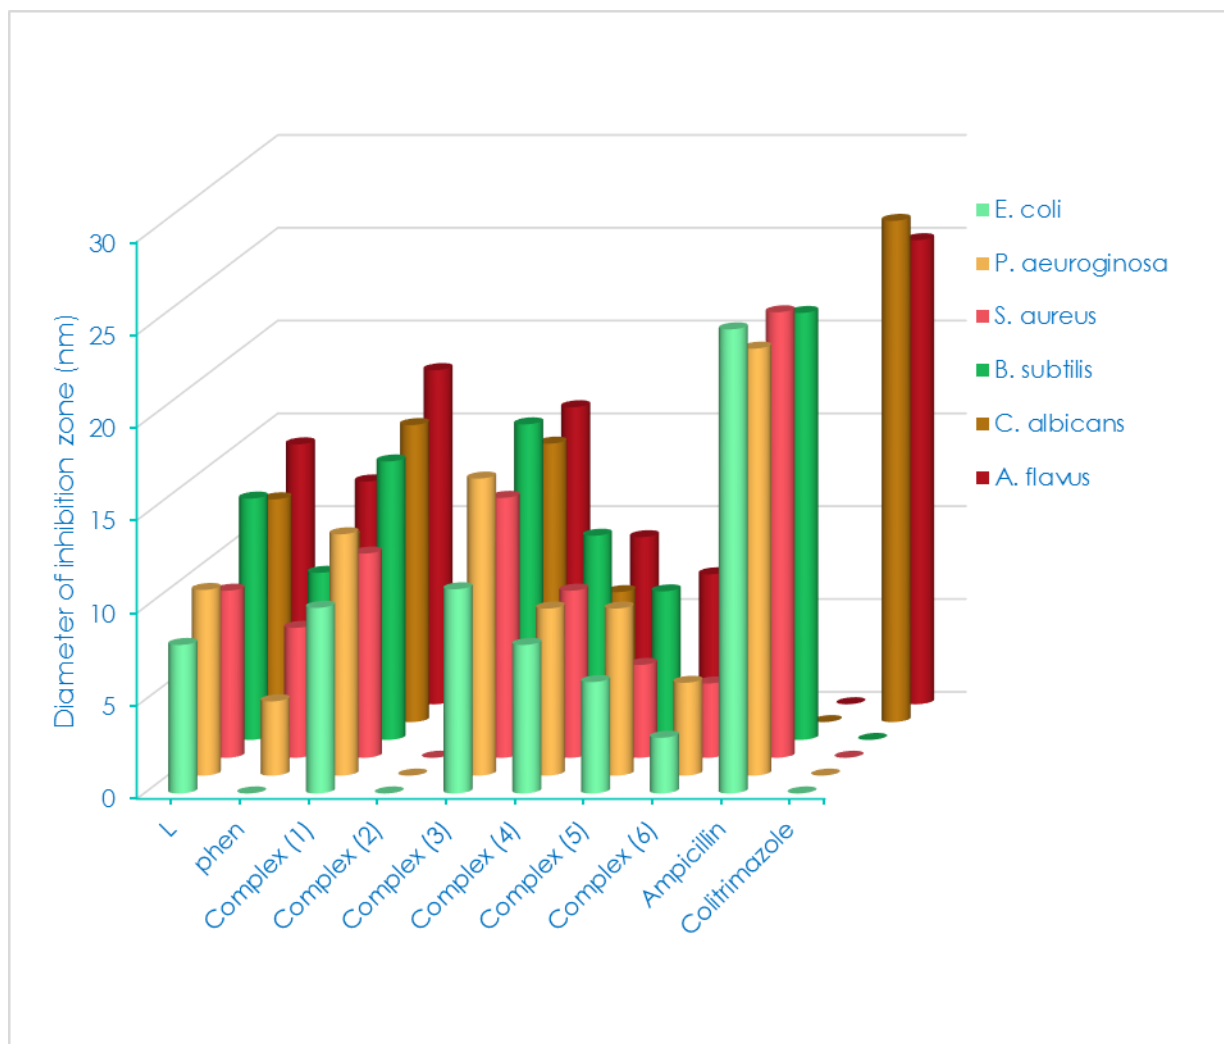

**Figure S5.** Statistical representation for biological activity for L, **Phen** and their metal complexes.



**Table S1.** Selected FT-IR bands for **L**, **Phen** and their metal complexes.

| Compounds   | $\nu(\text{O-H}); \text{H}_2\text{O}$ | $\nu(\text{N-H})$ | $\nu(\text{C}\equiv\text{N})$ | $\nu(\text{C}=\text{N})$ | $\nu(\text{M-O})$ and $\nu(\text{M-N})$ |
|-------------|---------------------------------------|-------------------|-------------------------------|--------------------------|-----------------------------------------|
| <b>L</b>    | 3408s                                 | 3263m, 3223m      | 2192vs                        | -                        | -                                       |
| <b>Phen</b> | 3380mbr                               | -                 | -                             | 1586ms                   | -                                       |
| <b>(1)</b>  | 3379vw                                | 3226w, 3320vw     | 2229w                         | 1519m                    | 719vs, 505s                             |
| <b>(2)</b>  | 3321vw                                | 3321vw, 3135vw    | 2227m                         | 1516s                    | 722vs, 516m                             |
| <b>(3)</b>  | 3406s                                 | 3269w, 3226w      | 2192m                         | 1517m                    | 721s, 506m                              |
| <b>(4)</b>  | 3405w                                 | 3327m, 3229m      | 2192m                         | 1518m                    | 725vs, 507m                             |
| <b>(5)</b>  | 3405m                                 | 3330m, 3231w      | 2193m                         | 1515s                    | 719vs, 629m                             |
| <b>(6)</b>  | 3405s                                 | 3331m, 3283m      | 2193m                         | 1507m                    | 732vs, 507m                             |

Keys: s=strong, w=weak, v=very, m=medium, br=broad,  $\nu$ =stretching.

**Table S2.** Maximum temperature ( $T_{\max}$ , °C) and mass loss of the decomposition steps for **L**, **phen** and metal complexes.

| Compounds   | Decomposition        | $T_{\max}$ (°C) | Mass loss (%) |       | Lost species                                                                       |
|-------------|----------------------|-----------------|---------------|-------|------------------------------------------------------------------------------------|
|             |                      |                 | Calc.         | Found |                                                                                    |
| <b>L</b>    | 1 <sup>st</sup> step | 239             | 62.63         | 62.95 | $\text{CH}_4+2\text{C}_2\text{H}_2+2\text{CO}+\text{C}_3\text{H}_4+0.5\text{Cl}_2$ |
|             | 2 <sup>nd</sup> step | 318, 520        | 37.37         | 36.94 | $\text{C}_4\text{H}_2+0.5\text{N}_2+\text{HCN}$                                    |
|             | Total loss           |                 | 100           | 99.89 |                                                                                    |
| <b>Phen</b> | 1 <sup>st</sup> step | 95              | 9.08          | 8.98  | $\text{H}_2\text{O}$                                                               |
|             | 2 <sup>nd</sup> step | 278             | 90.92         | 90.87 | $2\text{C}_4\text{H}_2+ 2\text{C}_2\text{H}_2+\text{N}_2$                          |
|             | Total loss           |                 | 100           | 100   |                                                                                    |
| <b>(1)</b>  | 1 <sup>st</sup> step | 85              | 6.09          | 6.00  | $2.5\text{H}_2\text{O}$                                                            |
|             | 2 <sup>nd</sup> step | 255             | 29.27         | 29.11 | $6\text{C}_2\text{H}_2+2\text{NO}$                                                 |
|             | 3 <sup>rd</sup> step | 477,770         | 57.59         | 57.41 | $7\text{C}_2\text{H}_2+\text{NO}+\text{CO}_2+2\text{Cl}_2+\text{HCN}$              |
|             | Total loss           |                 | 92.95         | 92.52 |                                                                                    |
|             | Residue              |                 | 7.04          | 7.48  | $\text{Cr}$                                                                        |
| <b>(2)</b>  | 1 <sup>st</sup> step | 87              | 3.74          | 3.70  | $1.5\text{H}_2\text{O}$                                                            |
|             | 2 <sup>nd</sup> step | 226             | 44.55         | 44.88 | $6\text{C}_2\text{H}_2+2\text{NO}+1.5\text{Cl}_2$                                  |
|             | 3 <sup>rd</sup> step | 383,511         | 44.00         | 45.15 | $7\text{C}_2\text{H}_2+\text{HCN}+\text{NO}+\text{CO}_2+0.5\text{Cl}_2$            |
|             | Total loss           |                 | 92.29         | 93.73 |                                                                                    |
|             | Residue              |                 | 7.71          | 6.27  | $\text{Fe}$                                                                        |
| <b>(3)</b>  | 1 <sup>st</sup> step | 79              | 3.90          | 3.73  | $1.5\text{H}_2\text{O}$                                                            |
|             | 2 <sup>nd</sup> step | 198             | 31.24         | 30.99 | $6\text{C}_2\text{H}_2+\text{N}_2+\text{O}_2$                                      |
|             | 3 <sup>rd</sup> step | 388             | 10.27         | 10.14 | $\text{Cl}_2$                                                                      |
|             | 4 <sup>th</sup> step | 640             | 43.74         | 43.41 | $7\text{C}_2\text{H}_2+2\text{CO}+\text{HCl}+\text{N}_2$                           |
|             | Total loss           |                 | 89.15         | 88.27 |                                                                                    |
| <b>(4)</b>  | Residue              |                 | 10.85         | 11.73 | $\text{CoO}$                                                                       |
|             | 1 <sup>st</sup> step | 68              | 6.34          | 6.28  | $2.5 \text{H}_2\text{O}$                                                           |
|             | 2 <sup>nd</sup> step | 183             | 40.46         | 39.68 | $6\text{C}_2\text{H}_2+\text{Cl}_2+\text{O}_2+\text{N}_2$                          |
|             | 3 <sup>rd</sup> step | 405             | 44.91         | 47.19 | $7\text{C}_2\text{H}_2+\text{HCN}+\text{NO}+\text{CO}_2+0.5\text{Cl}_2$            |
|             | Total loss           |                 | 91.71         | 93.15 |                                                                                    |
| <b>(5)</b>  | Residue              |                 | 8.27          | 6.85  | $\text{Ni}$                                                                        |
|             | 1 <sup>st</sup> step | 58              | 1.33          | 1.33  | $0.5\text{H}_2\text{O}$                                                            |
|             | 2 <sup>nd</sup> step | 182,358         | 42.33         | 41.8  | $6\text{C}_2\text{H}_2+2\text{NO}+\text{Cl}_2$                                     |
|             | 3 <sup>rd</sup> step | 639             | 46.97         | 47.16 | $7\text{C}_2\text{H}_2+\text{CO}+\text{CO}_2+\text{N}_2+\text{HCl}$                |
|             | Total loss           | 844             | 90.63         | 90.29 |                                                                                    |
| <b>(6)</b>  | Residue              |                 | 9.37          | 9.71  | $\text{Cu}$                                                                        |
|             | 1 <sup>st</sup> step | 87              | 2.61          | 2.66  | $\text{H}_2\text{O}$                                                               |
|             | 2 <sup>nd</sup> step | 163,268         | 57.99         | 57.58 | $8\text{C}_2\text{H}_2+\text{HCl}+\text{Cl}_2+2\text{CO}+\text{N}_2$               |
|             | 3 <sup>rd</sup> step | 491             | 17.99         | 18.00 | $3\text{C}_2\text{H}_2+\text{CO}+\text{H}_2\text{O}$                               |
|             | 4 <sup>th</sup> step | 607             | 11.90         | 12.39 | $\text{C}_2\text{H}_2+\text{CO}+\text{N}_2$                                        |
|             | Total loss           |                 | 90.49         | 90.63 |                                                                                    |
|             | Residue              |                 | 9.51          | 9.36  | $\text{Zn}$                                                                        |
